# Supplementary material for: Physicochemical properties and application of concentrated KN(SO2F)2/sulfolane solution in high-voltage high-power K-ion batteries
Source: Royal Society of Chemistry journal article supplement (doi:10.1039/d4ta06029f), 2024-10-26
Supplement: d4ta06029f1.pdf [file d4ta06029f1.pdf]

# **Physicochemical properties and application of concentrated KN(SO<sub>2</sub>F)<sub>2</sub>/sulfolane solution in high-voltage high-power K-ion batteries**

Daisuke Igarashi,<sup>a</sup> Ryoichi Tatara,<sup>a</sup> Satoshi Yasuno,<sup>b</sup> and Shinichi Komaba<sup>a\*</sup>

<sup>a</sup>Department of Applied Chemistry, Tokyo University of Science, Shinjuku,  
Tokyo, 162-8601, Japan

<sup>b</sup>Japan Synchrotron Radiation Research Institute (JASRI), Sayo-gun, Hyogo  
679-5198, Japan

Present Address for RT: Department of Chemistry and Life Science, Yokohama National University,  
Yokohama, Kanagawa, 240-8501, Japan

\* Corresponding author

E-mail: komaba@rs.tus.ac.jp

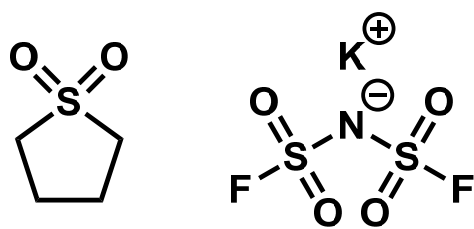

**Fig. S1.** Chemical structures of sulfolane (SL) and potassium bis(fluorosulfonyl)amide (KFSA)

**Table S1.** Physicochemical properties of the KFSA/SL = 1/n (mol/mol) solutions

| n   | Concentration<br>/ mol dm <sup>-3</sup> | Density<br>/ g cm <sup>-3</sup> | Viscosity<br>/ mPa s | Conductivity<br>/ mS cm <sup>-1</sup> |
|-----|-----------------------------------------|---------------------------------|----------------------|---------------------------------------|
| 1   | 5.11                                    | 1.733                           | 1848                 | 0.255                                 |
| 1.5 | 4.11                                    | 1.642                           | 599.7                | 0.572                                 |
| 2   | 3.44                                    | 1.579                           | 310.8                | 0.923                                 |
| 3   | 2.59                                    | 1.503                           | 128.1                | 1.538                                 |
| 4   | 2.08                                    | 1.456                           | 76.46                | 1.981                                 |
| 6   | 1.49                                    | 1.403                           | 48.25                | 2.44                                  |
| 8   | 1.16                                    | 1.373                           | 34.66                | 2.58                                  |
| 10  | 0.95                                    | 1.354                           | 29.39                | 2.55                                  |
| 20  | 0.50                                    | 1.313                           | 20.26                | 2.05                                  |
| 30  | 0.34                                    | 1.298                           | 17.35                | 1.611                                 |

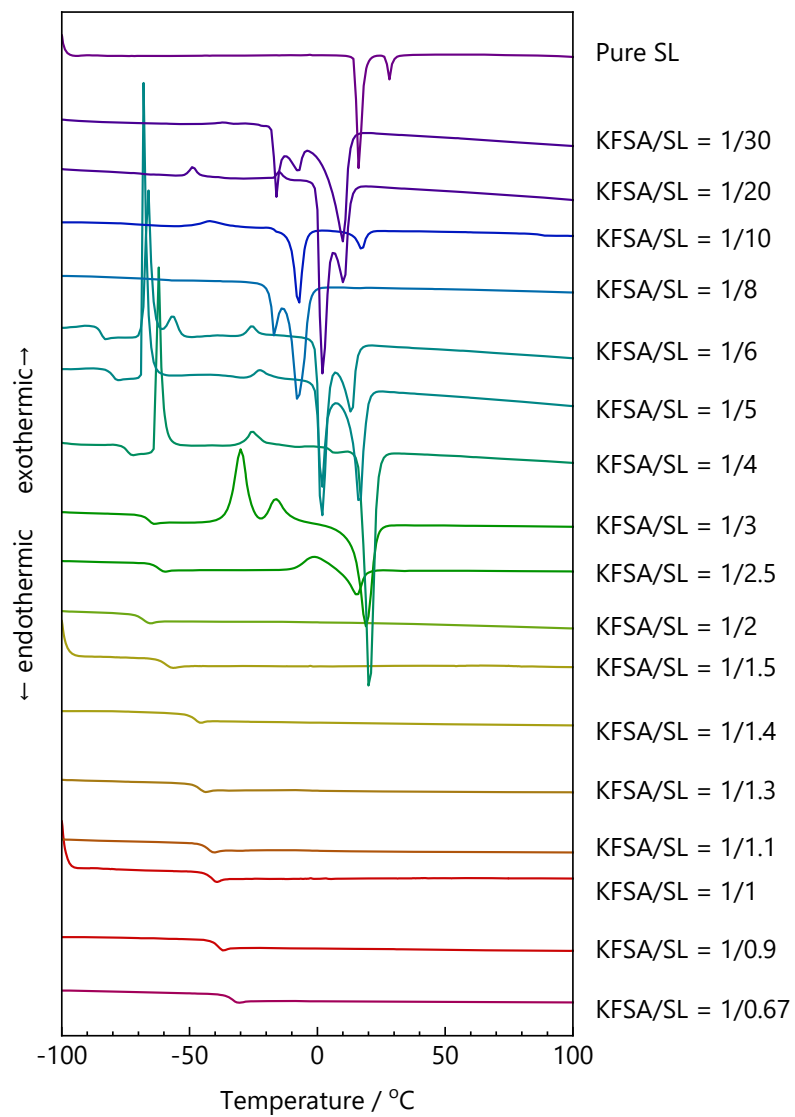

**Fig. S2.** DSC curves of the KFSA/SL = 1/n solutions.

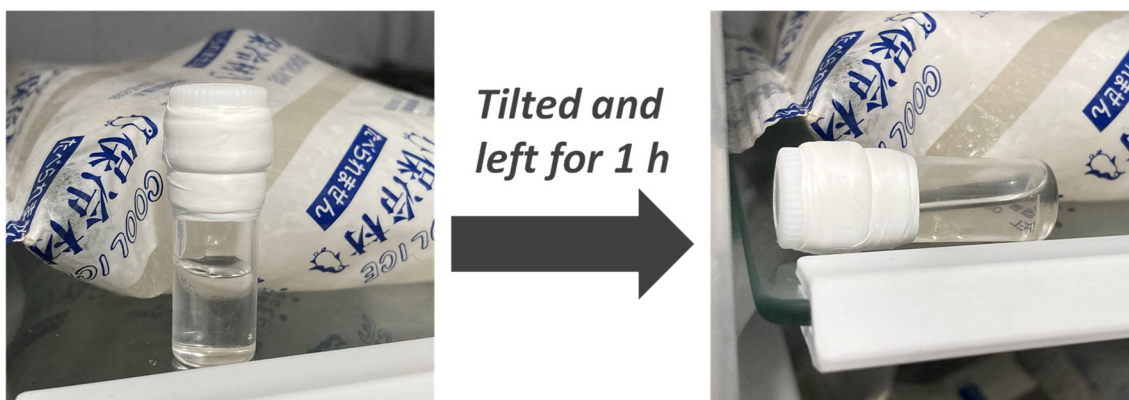

**Fig. S3.** Photograph of the KFSA/SL = 1/1 electrolyte stored in a freezer for over one year.

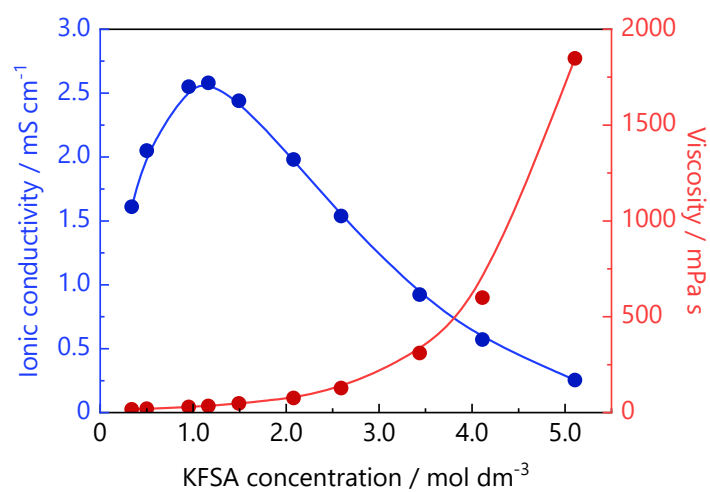

**Fig. S4.** Ionic conductivity and viscosity of the KFSA/SL = 1/n electrolyte at 25 °C. The measured points were connected using B-spline curves.

**Table S2.** Physicochemical properties of KFSA/G3 = 1/1 and 1 mol dm<sup>-3</sup> KPF<sub>6</sub> / EC:PC

| Electrolyte                                     | Concentration<br>/ mol dm <sup>-3</sup> | Density<br>/ g cm <sup>-3</sup> | Viscosity<br>/ mPa s | Conductivity<br>/ mS cm <sup>-1</sup> |
|-------------------------------------------------|-----------------------------------------|---------------------------------|----------------------|---------------------------------------|
| KFSA/G3 = 1/1                                   | 3.54                                    | 1.406                           | 212.0                | 0.909                                 |
| 1 mol dm <sup>-3</sup> KPF <sub>6</sub> / EC:PC | 1                                       | 1.363                           | 5.885                | 8.20                                  |

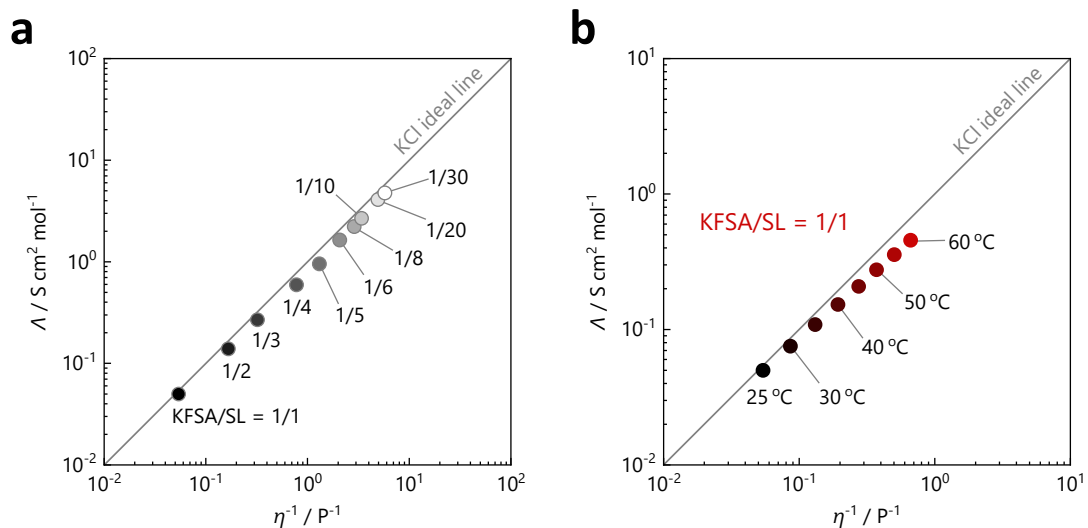

**Fig. S5.** Walden plots of the (a) KFSA/SL = 1/n solutions with different mixing ratios and (b) KFSA/SL = 1/1 solution at different temperatures.

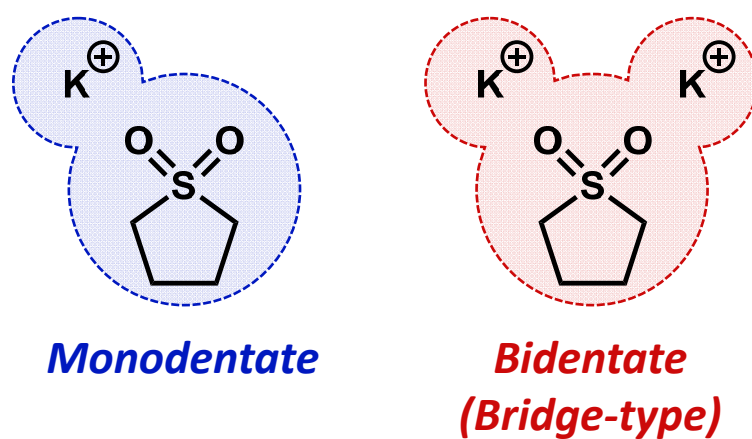

**Fig. S6.** Schematic of  $K^+$ /SL in monodentate and bidentate solvation structures.

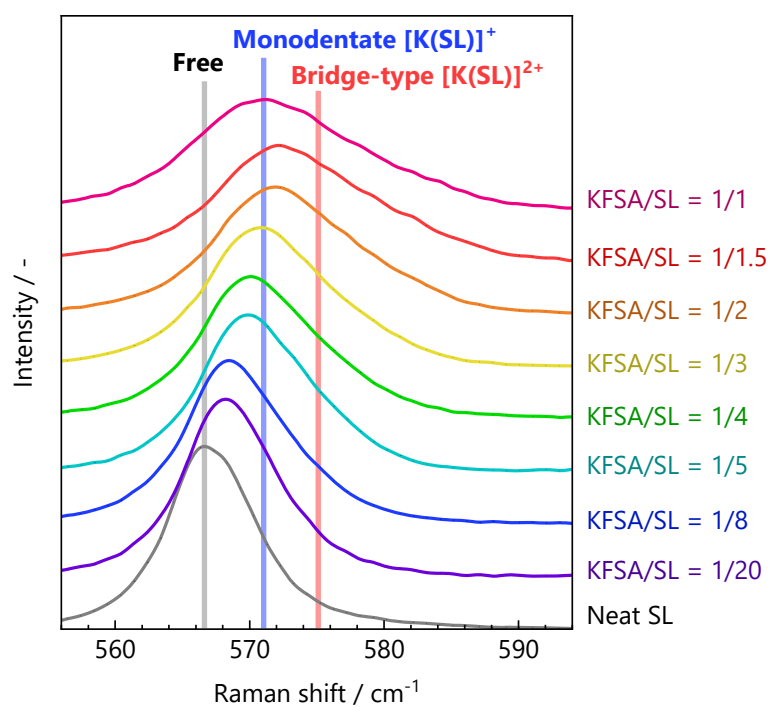

**Fig. S7.** Raman spectra of the KFSA/SL = 1/n solutions.

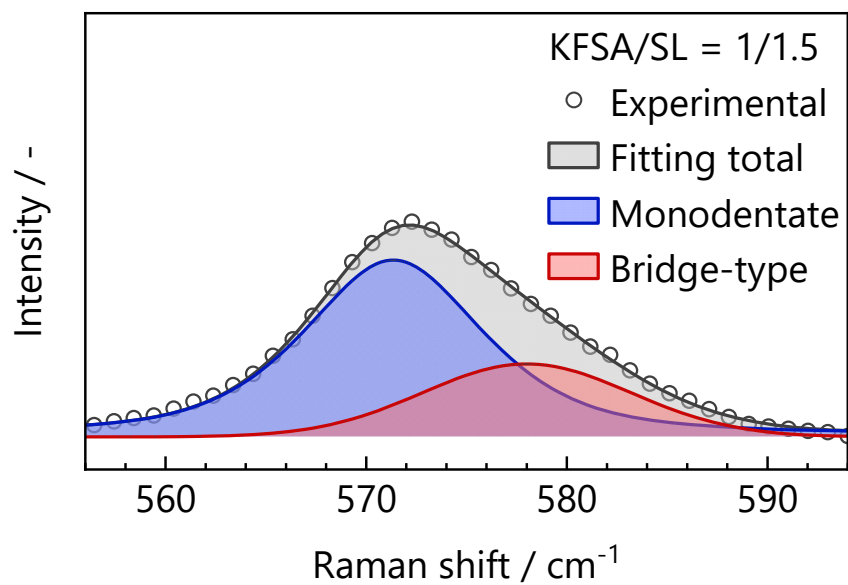

**Fig. S8.** Deconvoluted Raman spectrum of the KFSA/SL = 1/1.5 solution.

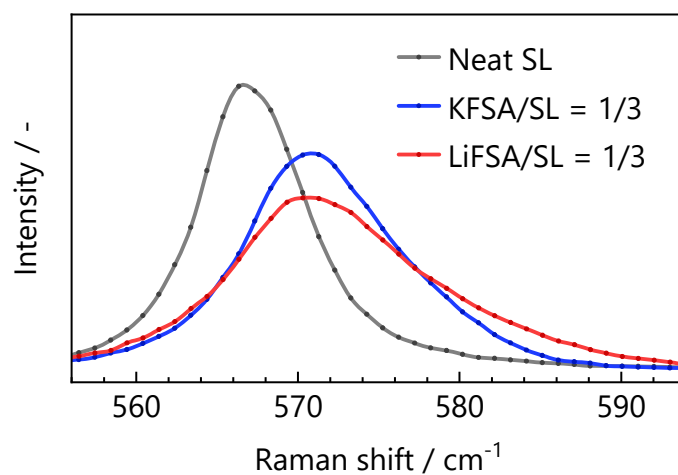

**Fig. S9.** Raman spectra of the neat SL, KFSA/SL = 1/3, and LiFSA/SL = 1/3 solutions.

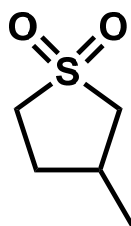

**Fig. S10.** Chemical structure of 3-methylsulfolane.

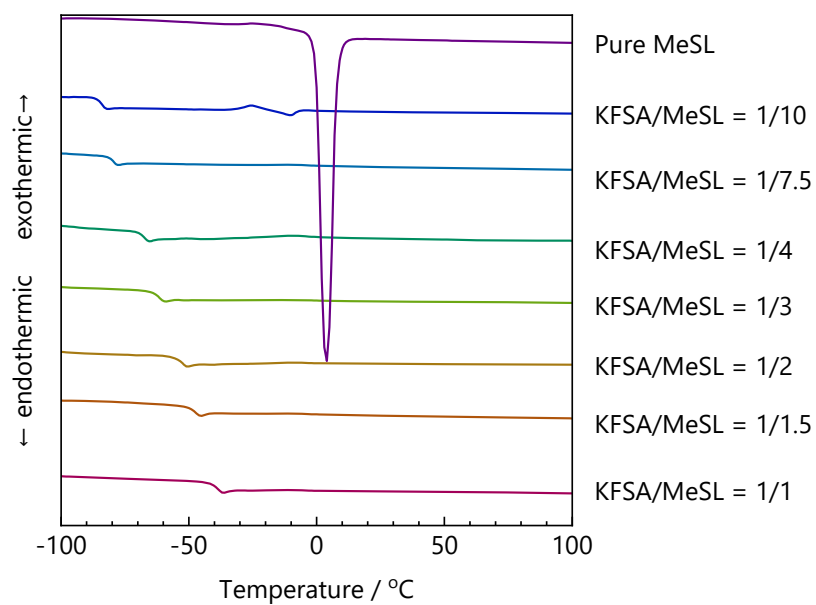

**Fig. S11.** DSC curves of the KFSa/MeSL = 1/n solutions.



**Table S3.** Physicochemical properties of the XFSA/SL = 1/1 solutions

| Cation<br>(X) | Concentration<br>/ mol dm <sup>-3</sup>          | Density<br>/ g cm <sup>-3</sup> | Viscosity<br>/ mPa s | Conductivity<br>/ mS cm <sup>-1</sup> |
|---------------|--------------------------------------------------|---------------------------------|----------------------|---------------------------------------|
| Li            | 4.91                                             | 1.578                           | 2396                 | 0.202                                 |
| Na            | Inhomogeneous mixture of liquid and precipitates |                                 |                      |                                       |
| K             | 4.68                                             | 1.655                           | 2447                 | 0.159                                 |

**Table S4.** Physicochemical properties of the XFSA/SL = 1/1.5 solution

| Cation<br>(X) | Concentration<br>/ mol dm <sup>-3</sup> | Density<br>/ g cm <sup>-3</sup> | Viscosity<br>/ mPa s | Conductivity<br>/ mS cm <sup>-1</sup> |
|---------------|-----------------------------------------|---------------------------------|----------------------|---------------------------------------|
| Li            | 3.85                                    | 1.496                           | 747.6                | 0.444                                 |
| Na            | 3.82                                    | 1.546                           | 1533.0               | 0.0621                                |
| K             | 3.70                                    | 1.554                           | 780.4                | 0.348                                 |

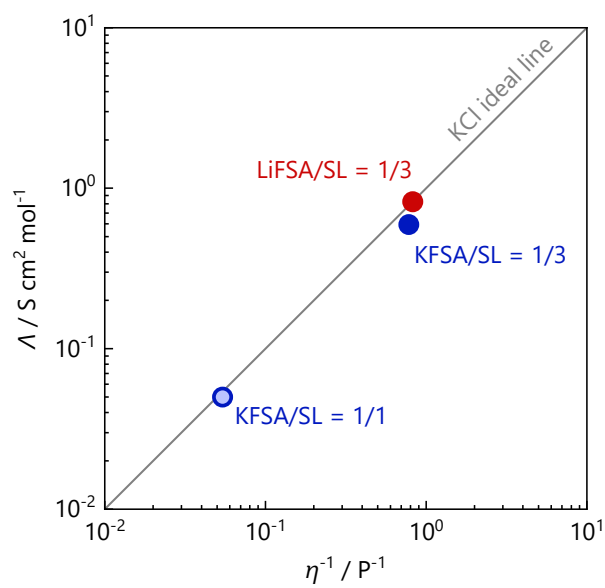

**Fig. S12.** Walden plots for the KFSA/SL = 1/1, KFSA/SL = 1/3, and LiFSA/SL = 1/3 solutions.

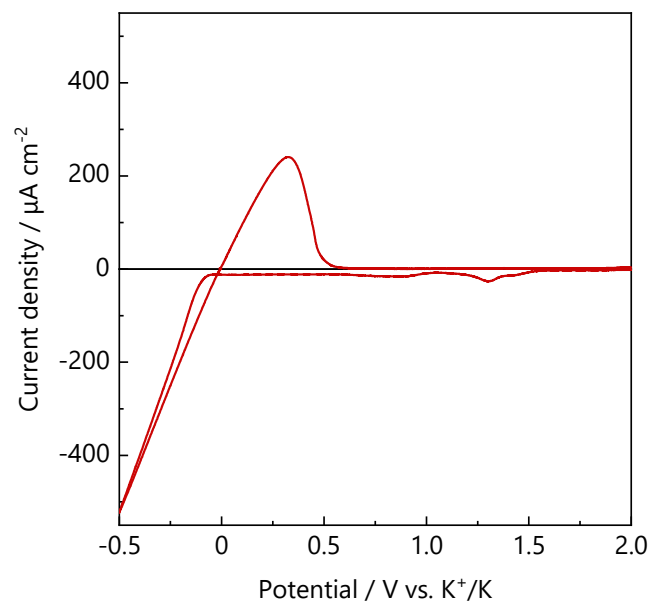

**Fig. S13.** Cyclic voltammogram of the Cu foil in the KFSA/SL = 1/1 electrolyte measured using a three-electrode cell. The counter and reference electrodes were an activated carbon–acetylene black–polyvinylidene difluoride composite and a potassium metal wire, respectively.

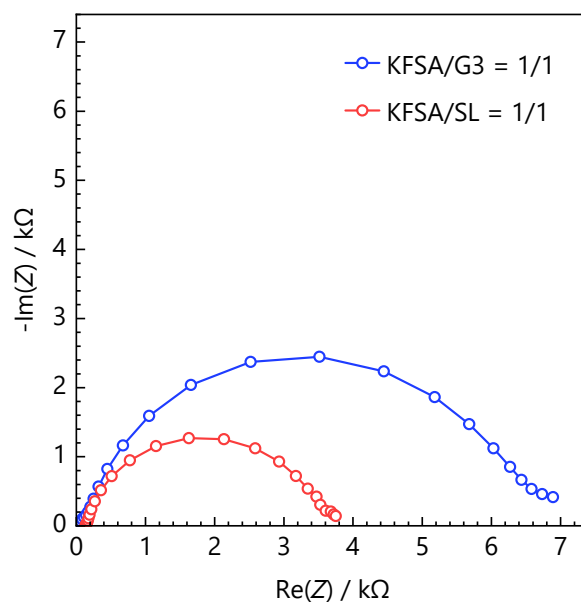

**Fig. S14.** Nyquist plots of the electrochemical impedance spectra of K//K symmetric cells with the KFSA/G3 = 1/1 and KFSA/SL = 1/1 electrolytes.

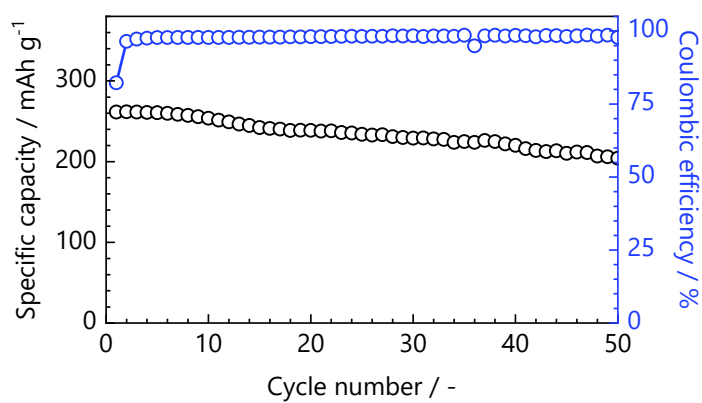

**Fig. S15.** Cycling performance and Coulombic efficiency of the graphite//K cell with the KFSA/SL = 1/1 solution.

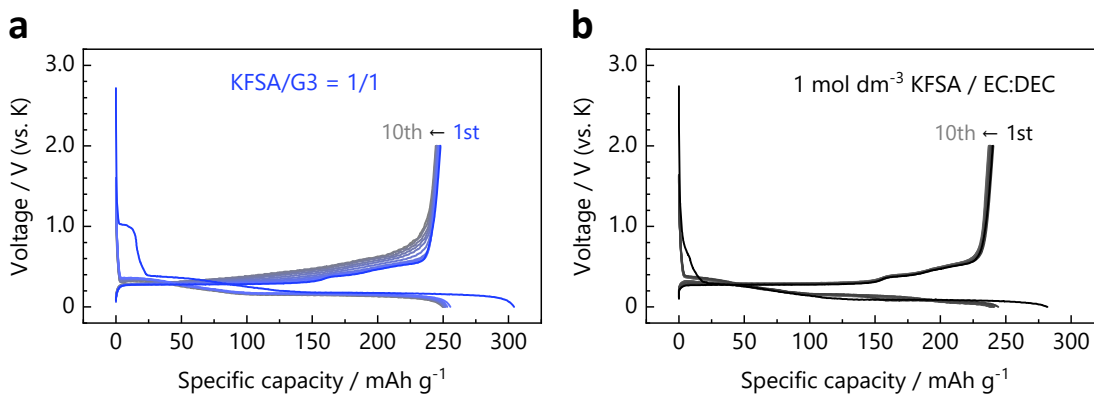

**Fig. S16.** Charge–discharge curves of the graphite electrodes in the (a) 1 mol dm<sup>-3</sup> KFSa/EC:DEC and (b) KFSa/G3 = 1/1 electrolytes.

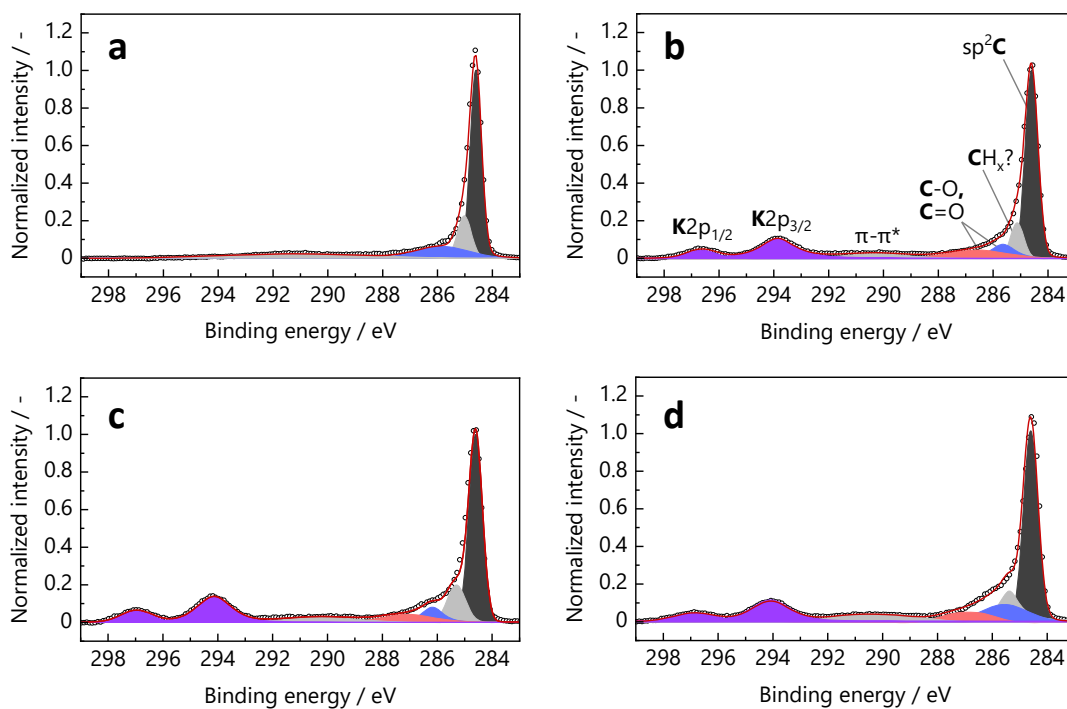

**Fig. S17.** HAXPES profiles of the graphite electrodes (a) before and after cycling in the (b) KFSa/SL = 1/1, (c) KFSa/G3 = 1/1, and (d) 1 mol dm<sup>-3</sup> KFSa/EC:DEC electrolytes.

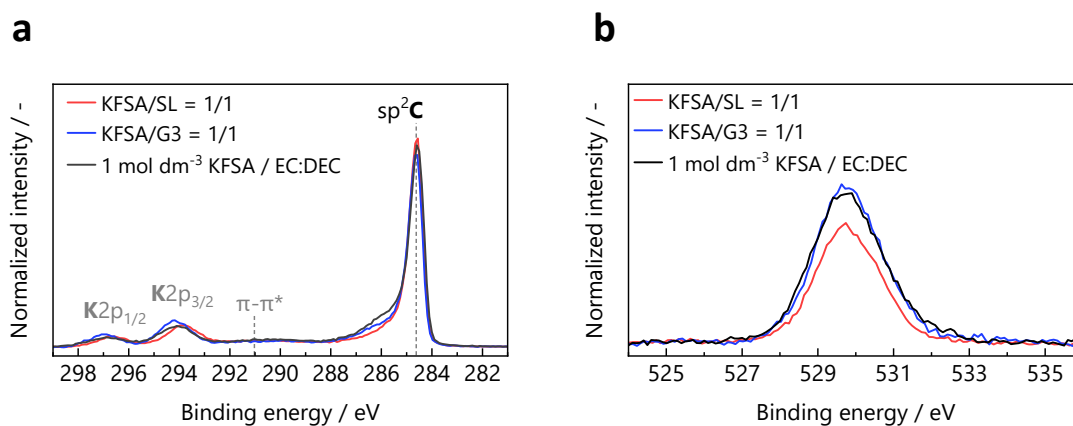

**Fig. S18.** (a) C 1s and (b) O 1s HAXPES profiles of the graphite electrodes cycled in the KFSA/SL = 1/1, KFSA/G3 = 1/1, and 1 mol dm<sup>-3</sup> KFSA/EC:DEC electrolytes. (a) shows the overlapping of the spectra shown in Figs. S17b–d.

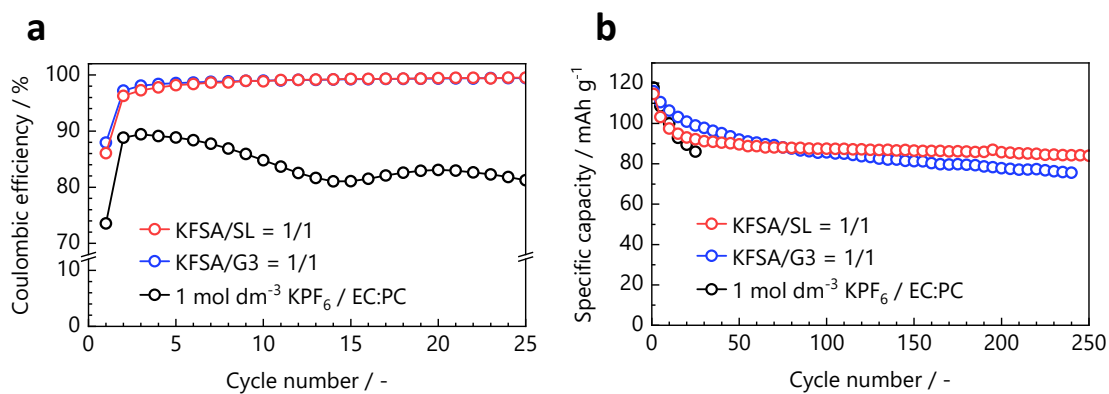

**Fig. S19.** (a) Coulombic efficiency and (b) long-term cycling performance of the  $K_2Mn[Fe(CN)_6]$  electrodes.

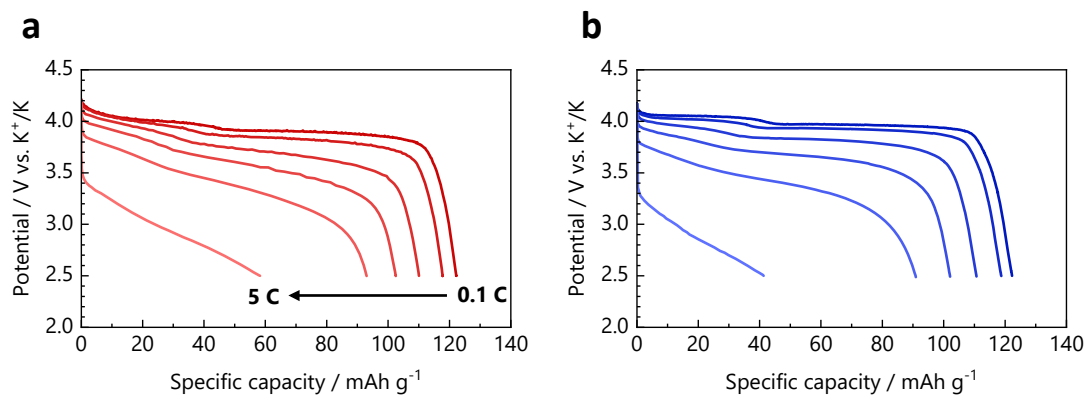

**Fig. S20.** Discharge rate curves of the  $\text{K}_2\text{Mn}[\text{Fe}(\text{CN})_6]$  electrodes at different current densities.

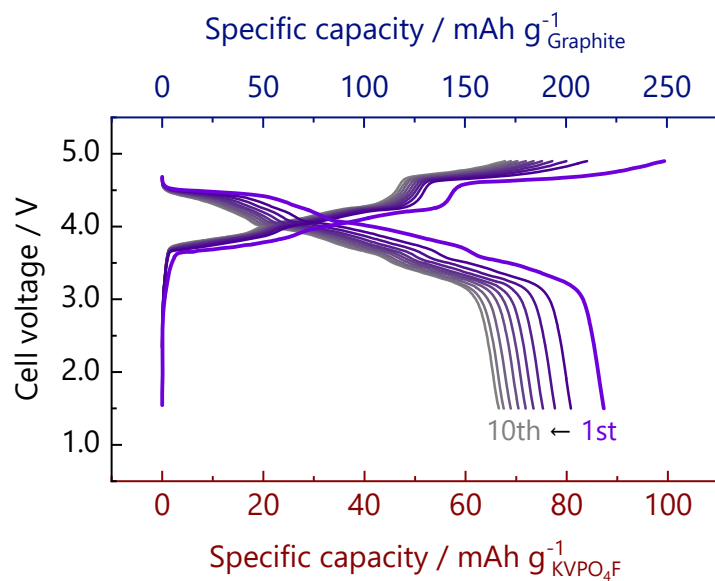

**Fig. S21** Charge-discharge curves of the  $\text{KVPO}_4\text{F} \mid \text{KFSA/SL} = 1/1 \mid \text{graphite}$  full cell.

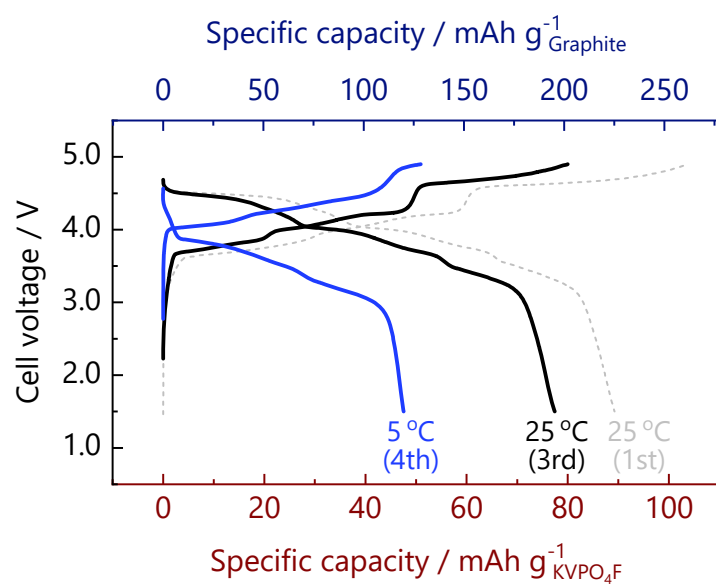

**Fig. S22** Charge–discharge curves of the KVPO<sub>4</sub>F | KFSa/SL = 1/1 | graphite full cell operated at 25 °C for 1st – 3rd cycle and 5 °C for 4th cycle.
